# Supplementary material for: Microporous 2D indium metal–organic frameworks for selective CO2 capture and their application in the catalytic CO2-cycloaddition of epoxides
Source: Royal Society of Chemistry journal article supplement (doi:10.1039/c8dt01405a), 2018-01-01
Supplement: c8dt01405a1.pdf [file c8dt01405a1.pdf]

## Supporting Information for

### Microporous 2D indium metal-organic frameworks for selective CO<sub>2</sub> capture and their application in the catalytic CO<sub>2</sub>-cycloaddition of epoxides

Yuan-Han Li,<sup>a</sup> Sue-Lein Wang,<sup>\*a,b</sup> Yu-Chia Su,<sup>c</sup> Bao-Tsan Ko<sup>\*b,c</sup> Chen-Yen Tsai<sup>b</sup> and Chia-Her Lin<sup>\*b,d</sup>

<sup>a</sup>Department of Chemistry, National Tsing Hua University, Hsinchu 300, Taiwan

<sup>b</sup>Department of Chemistry, Chung-Yuan Christian University, Chungli 32023, Taiwan

<sup>c</sup>Department of Chemistry, National Chung Hsing University, Taichung 402, Taiwan

<sup>d</sup>R&D Center for Membrane Technology, Chung Yuan Christian University, Chungli 32023, Taiwan.

Corresponding Author

\*Tel: (+886) 3-5715131. E-mail: slwang@mx.nthu.edu.tw (S.-L. Wang)

\*Tel: (+886) 4-22840411-715. E-mail: btko@dragon.nchu.edu.tw (B.-T. Ko)

\*Tel: (+886) 3-2653315. E-mail: chiaher@cycu.edu.tw (C.-H. Lin)

**Table S1.** Crystallographic Data.

|                                                    | <b>1</b>                                            | <b>2</b>                                                                           | <b>3</b>                                                                              | <b>4</b>                                                                       |
|----------------------------------------------------|-----------------------------------------------------|------------------------------------------------------------------------------------|---------------------------------------------------------------------------------------|--------------------------------------------------------------------------------|
| formula                                            | C <sub>28</sub> H <sub>16</sub> InO <sub>12</sub> S | C <sub>105</sub> H <sub>108</sub> In <sub>4</sub> O <sub>44</sub> N <sub>4</sub> S | C <sub>11</sub> H <sub>6.50</sub> In <sub>0.50</sub> N <sub>0.50</sub> O <sub>5</sub> | C <sub>70</sub> H <sub>40</sub> Cl <sub>2</sub> In <sub>3</sub> O <sub>2</sub> |
|                                                    | 2                                                   | 4                                                                                  | S <sub>0.50</sub>                                                                     | 0                                                                              |
| fw                                                 | 723.37                                              | 362.36                                                                             | 299.1                                                                                 | 1614.38                                                                        |
| space group                                        | <i>P</i> -1                                         | <i>Ccca</i>                                                                        | <i>Ccca</i>                                                                           | <i>P2<sub>1</sub>2<sub>1</sub>2</i>                                            |
| <i>a</i> , Å                                       | 7.2978(4)                                           | 14.5653(3)                                                                         | 15.0622(4)                                                                            | 29.6876(5)                                                                     |
| <i>b</i> , Å                                       | 12.1206(7)                                          | 21.0484(5)                                                                         | 20.9202(5)                                                                            | 33.7481(5)                                                                     |
| <i>c</i> , Å                                       | 20.9806(11)                                         | 23.9140(9)                                                                         | 23.4817(7)                                                                            | 9.4487(5)                                                                      |
| <i>α</i> , °                                       | 78.626(3)                                           | 90                                                                                 | 90                                                                                    | 90                                                                             |
| <i>β</i> , °                                       | 85.181(3)                                           | 90                                                                                 | 90                                                                                    | 90                                                                             |
| <i>γ</i> , °                                       | 84.564(3)                                           | 90                                                                                 | 90                                                                                    | 90                                                                             |
| volume, Å <sup>3</sup>                             | 1807.12(17)                                         | 7331.5(3)                                                                          | 7399.2(4)                                                                             | 9466.7(2)                                                                      |
| <i>Z</i>                                           | 2                                                   | 2                                                                                  | 16                                                                                    | 4                                                                              |
| <i>D</i> <sub>cacl</sub> , g cm <sup>-3</sup>      | 1.329                                               | 1.060                                                                              | 1.074                                                                                 | 1.134                                                                          |
| <i>μ</i> , mm <sup>-1</sup>                        | 0.821                                               | 0.736                                                                              | 0.732                                                                                 | 6.755                                                                          |
| <i>T</i> , °C                                      | 296(2)                                              | 295(2)                                                                             | 296(2)                                                                                | 296(2)                                                                         |
| <i>λ</i> , Å                                       | 0.71073                                             | 0.71073                                                                            | 0.71073                                                                               | 1.54178                                                                        |
| reflections collected                              | 27446                                               | 31859                                                                              | 32917                                                                                 | 63217                                                                          |
| independent reflections                            | 8698                                                | 4517                                                                               | 4598                                                                                  | 16415                                                                          |
| <i>R</i> (int)                                     | 0.0896                                              | 0.1087                                                                             | 0.0913                                                                                | 0.0414                                                                         |
| Goodness-of-fit on <i>F</i> <sup>2</sup>           | 0.902                                               | 0.807                                                                              | 0.886                                                                                 | 1.086                                                                          |
| <i>R</i> <sub>1</sub> [ <i>I</i> >2σ( <i>I</i> )]  | 0.0280                                              | 0.0876                                                                             | 0.0501                                                                                | 0.0656                                                                         |
| <i>wR</i> <sub>2</sub> [ <i>I</i> >2σ( <i>I</i> )] | 0.0654                                              | 0.2662                                                                             | 0.1407                                                                                | 0.2044                                                                         |
| <i>R</i> <sub>1</sub> [all data]                   | 0.0353                                              | 0.1408                                                                             | 0.1121                                                                                | 0.0737                                                                         |
| <i>wR</i> <sub>2</sub> [all data]                  | 0.0679                                              | 0.2852                                                                             | 0.1449                                                                                | 0.2162                                                                         |
| CCDC No.                                           | 1823435                                             | 1823434                                                                            | 1823437                                                                               | 1823436                                                                        |

**Table S2.** Selected bond lengths (Å).

| <b>1</b>     |           |              |           |
|--------------|-----------|--------------|-----------|
| In(1)-O(1)   | 2.351(3)  | In(1)-O(2)   | 2.169(3)  |
| In(1)-O(3)   | 2.207(3)  | In(1)-O(4)   | 2.422(3)  |
| In(1)-O(5)   | 2.286(3)  | In(1)-O(6)   | 2.257(3)  |
| In(1)-O(7)#1 | 2.415(4)  | In(1)-O(8)#1 | 2.222(4)  |
| <b>2</b>     |           |              |           |
| In(1)-O(1)   | 2.305(3)  | In(1)-O(1)#1 | 2.305(3)  |
| In(1)-O(2)   | 2.257(3)  | In(1)-O(2)#1 | 2.257(3)  |
| In(1)-O(4)   | 2.300(3)  | In(1)-O(4)#1 | 2.300(3)  |
| In(1)-O(5)   | 2.237(3)  | In(1)-O(5)#1 | 2.236(3)  |
| <b>3</b>     |           |              |           |
| In(1)-O(1)   | 2.306(6)  | In(1)-O(4)   | 2.312(5)  |
| In(1)-O(1)#1 | 2.306(6)  | In(1)-O(4)#1 | 2.312(5)  |
| In(1)-O(2)   | 2.270(6)  | In(1)-O(5)   | 2.235(5)  |
| In(1)-O(2)#1 | 2.270(5)  | In(1)-O(5)#1 | 2.235(5)  |
| <b>4</b>     |           |              |           |
| In(1)-O(15)  | 2.154(9)  | In(1)-O(17)  | 2.230(7)  |
| In(1)-O(19)  | 2.239(9)  | In(1)-O(4)   | 2.246(8)  |
| In(1)-O(3)   | 2.247(8)  | In(1)-O(18)  | 2.318(7)  |
| In(1)-O(20)  | 2.358(11) | In(1)-O(16)  | 2.539(12) |
| In(2)-O(8)   | 2.147(8)  | In(2)-O(12)  | 2.155(7)  |
| In(2)-O(9)   | 2.168(6)  | In(2)-O(10)  | 2.322(8)  |
| In(2)-O(11)  | 2.430(9)  | In(2)-O(7)   | 2.564(9)  |
| In(2)-Cl(1)  | 2.385(3)  | In(3)-O(5)   | 2.162(8)  |
| In(3)-O(14)  | 2.169(7)  | In(3)-O(1)   | 2.234(7)  |
| In(3)-O(2)   | 2.244(6)  | In(3)-O(13)  | 2.457(9)  |
| In(3)-O(6)   | 2.491(9)  | In(3)-Cl(2)  | 2.386(3)  |

Symmetry transformations used to generate equivalent atoms: for **2**, #1  $-x+1/2, -y, z$ , #2  $-x, y, -z+1/2$ ; for **3**, #1  $-x+1/2, -y, z$  #2  $-x+0, -y-1/2, z$  #3  $-x+1, -y, -z+1$ ; for **4**, #1  $x+1/2, y-1/2, -z$ , #2  $x-1/2, y+1/2, -z$ , #3  $-x, -y, -z$ .

(a)

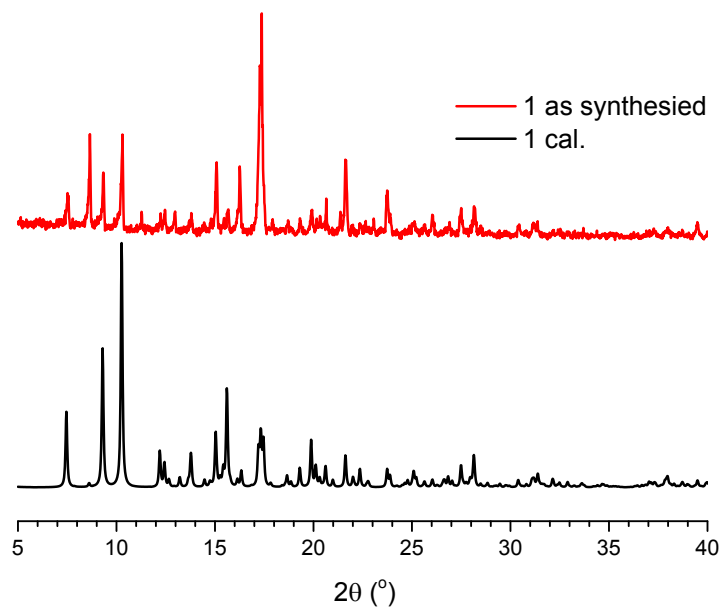

(b)

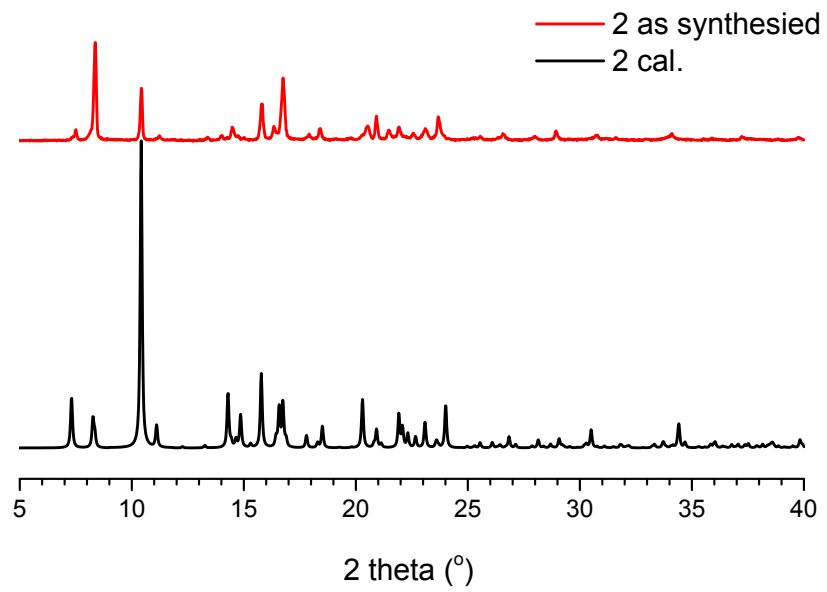

(c)

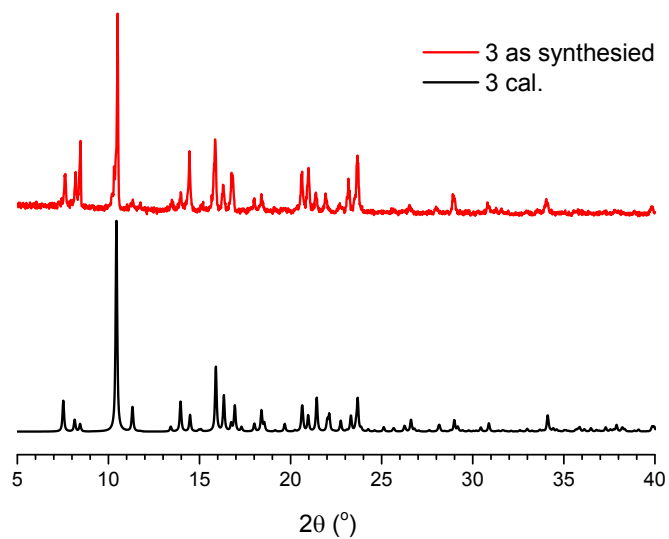

(d)

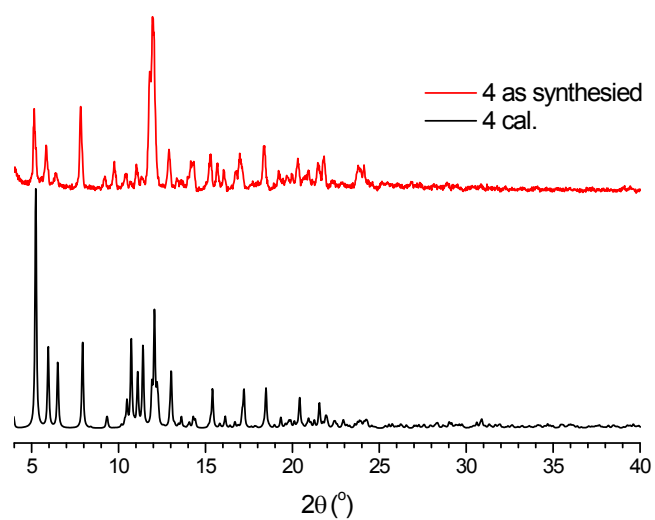

**Figure S1.** The PXRD patterns of compounds **1** (a), **2** (b), **3** (c), **4** (d).

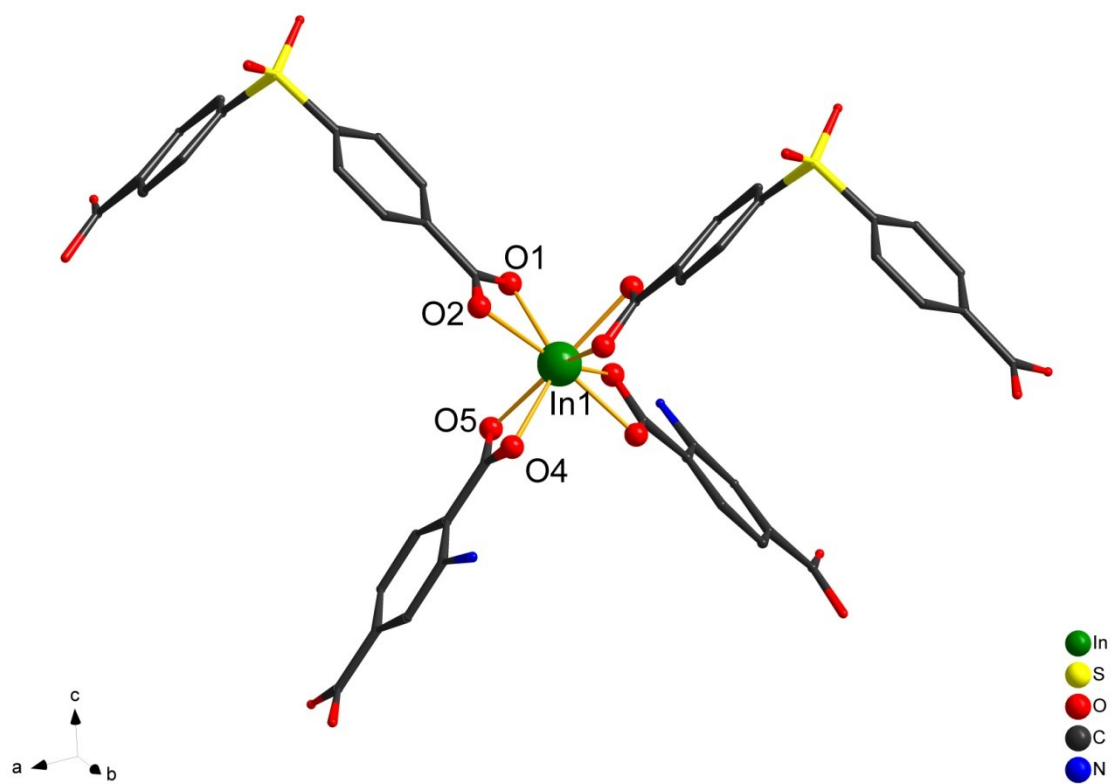

**Figure S2.** (a) The coordination environment around Incenters in **3**

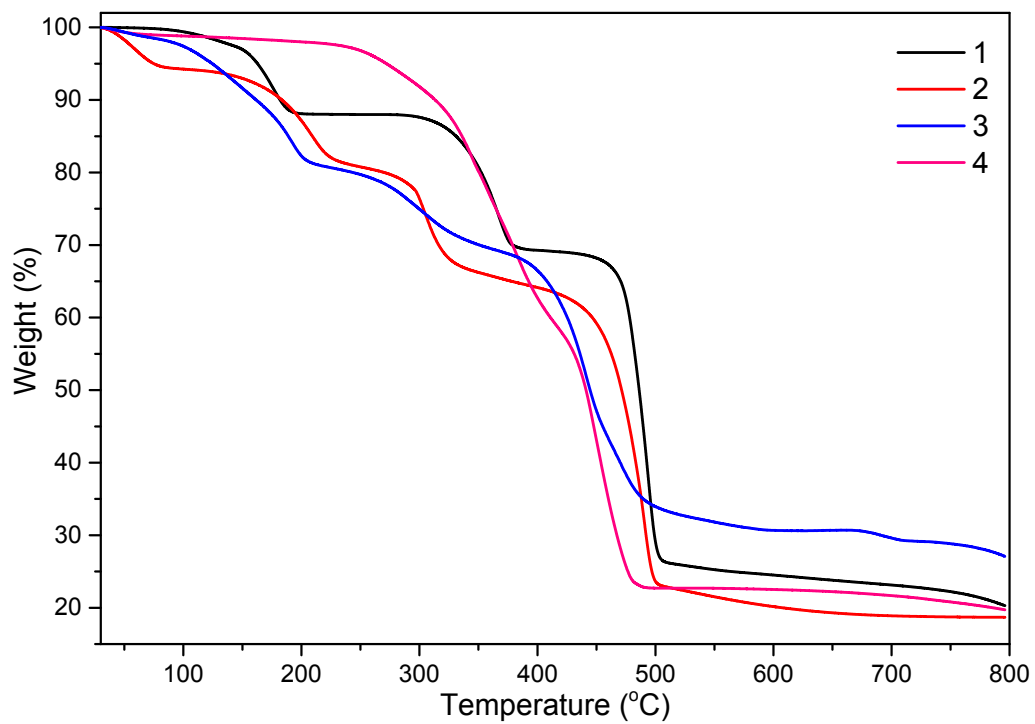

**Figure S3.** TGA curves of compound **1** (black), **2** (red), **3** (blue), and **4** (pink).

(a)

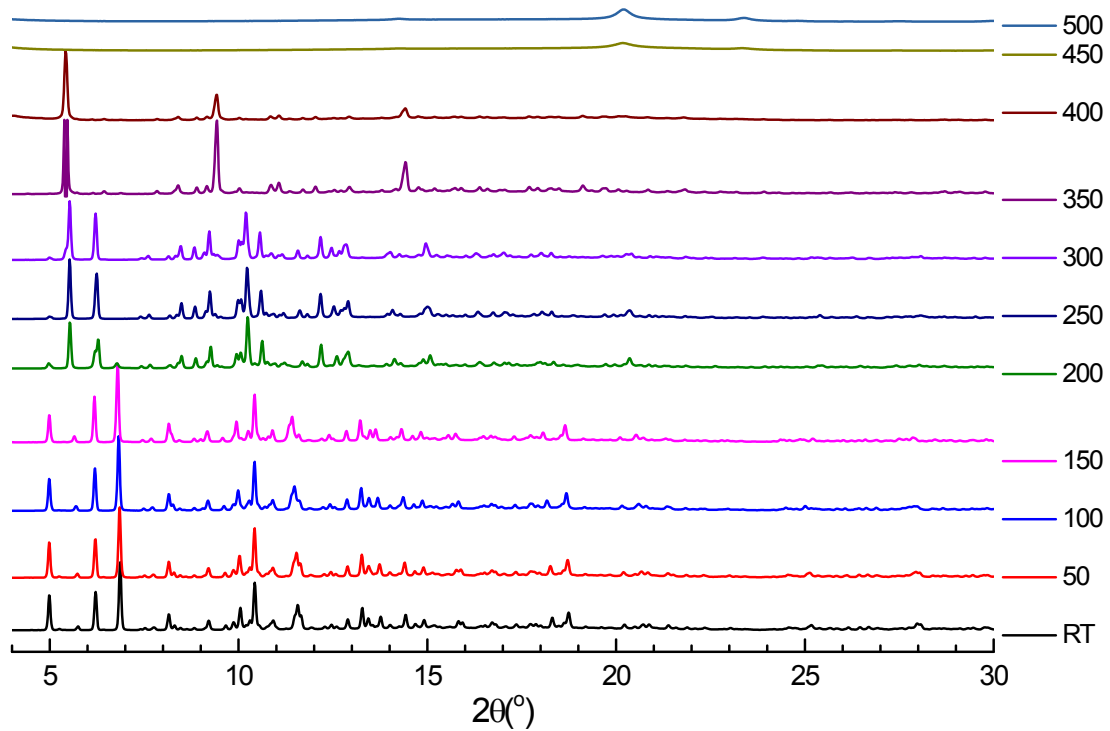

(b)

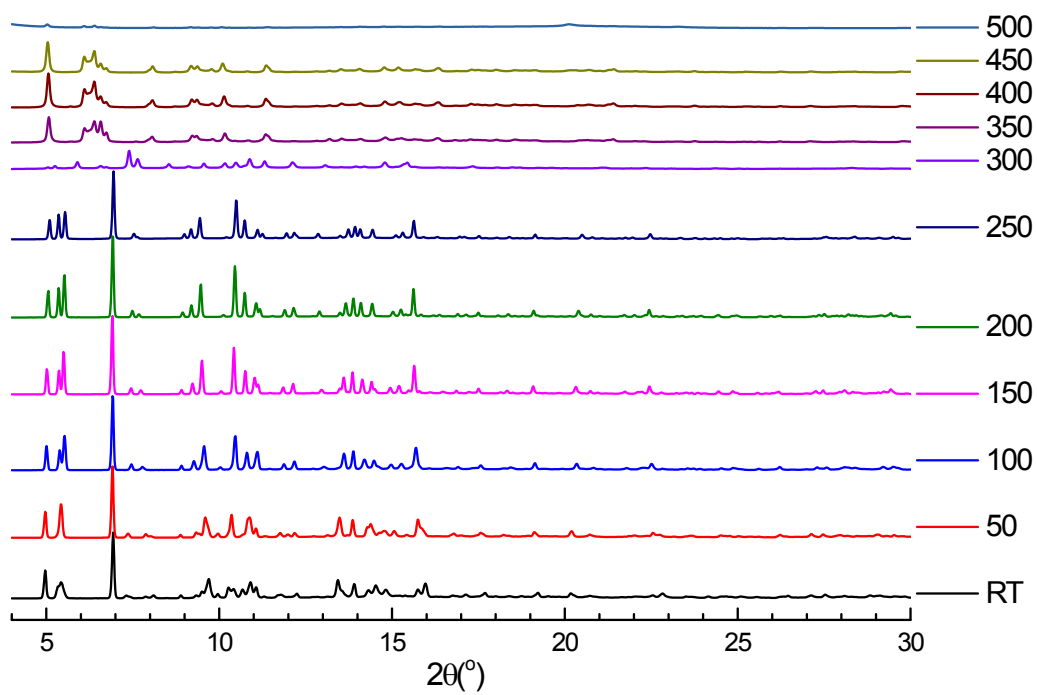



(c)

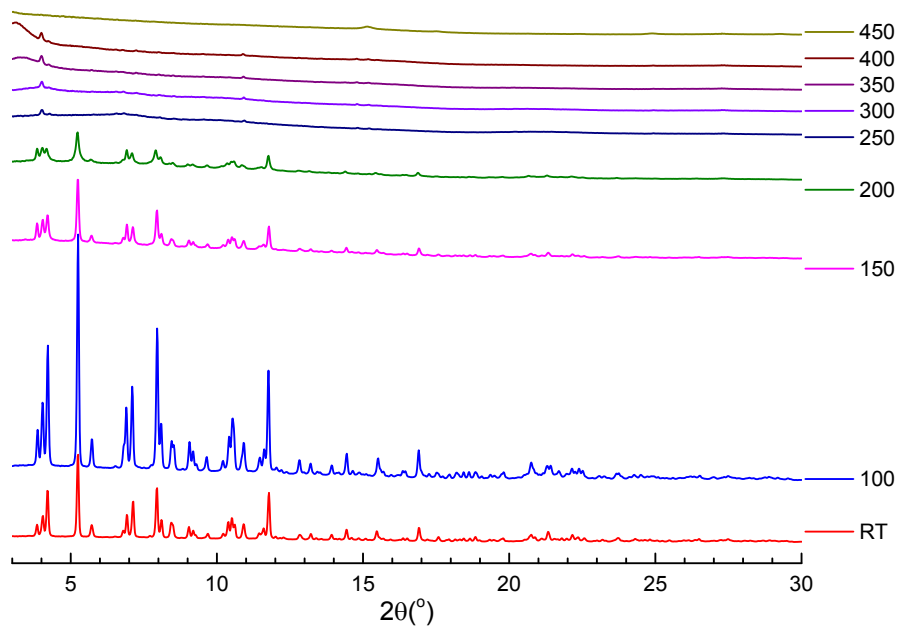

(d)

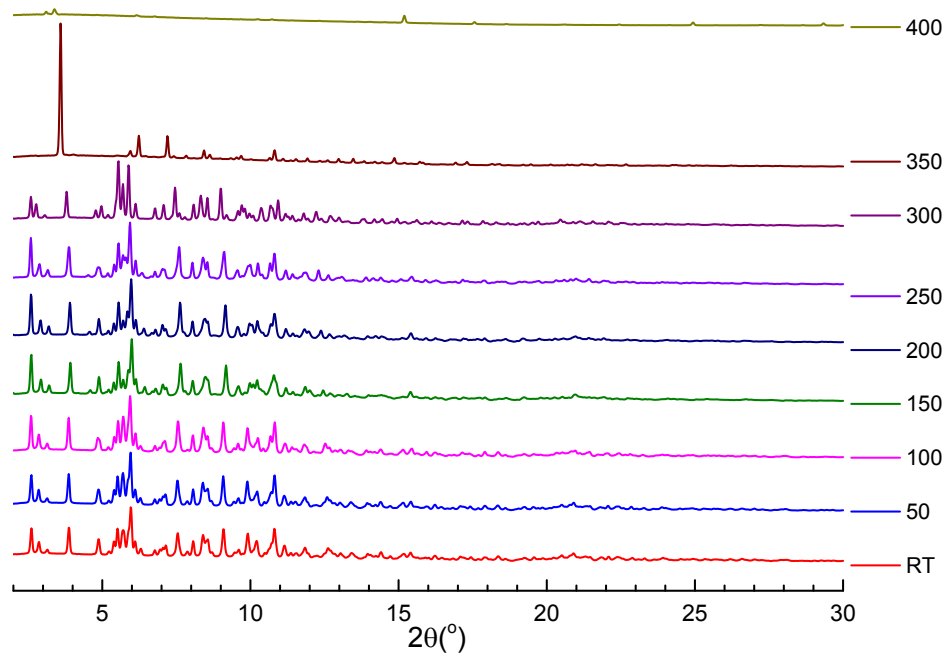

**Figure S4.** The varied temperature PXRD patterns of **1** (a), **2**(b), **3** (c), and **4** (d).

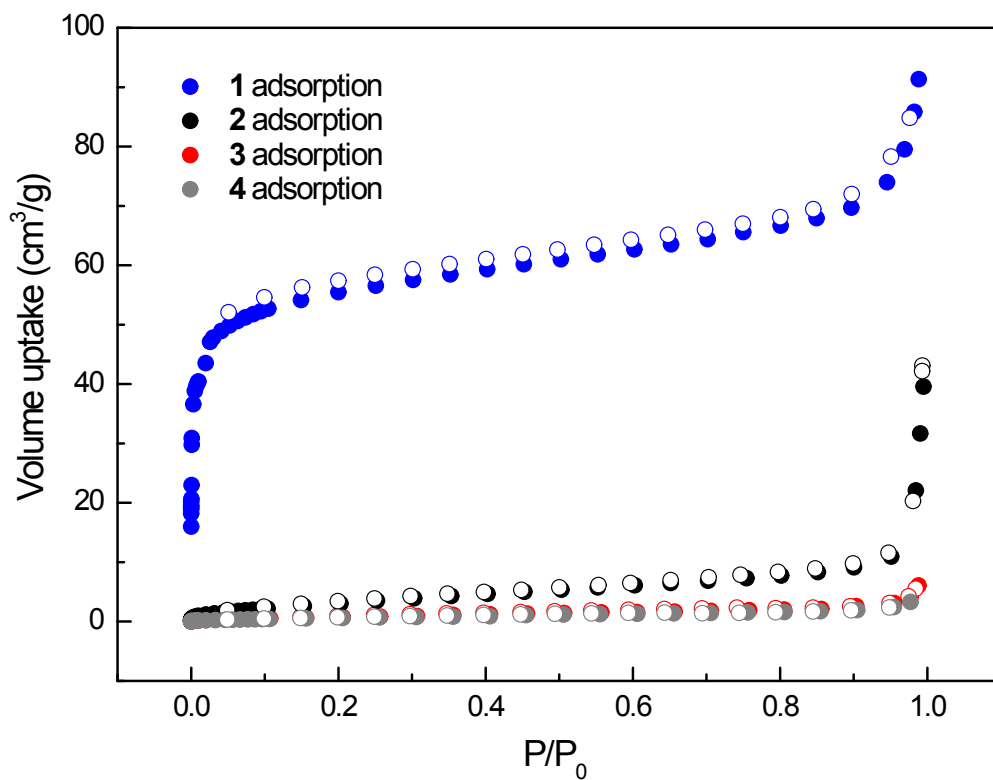

**Figure S5.** The N<sub>2</sub> adsorption-desorption isotherms of compound **1** (blue), **2** (black), **3** (red), and **4** (Gray) at 77 K (the closed and open symbol represents the adsorption and desorption respectively).

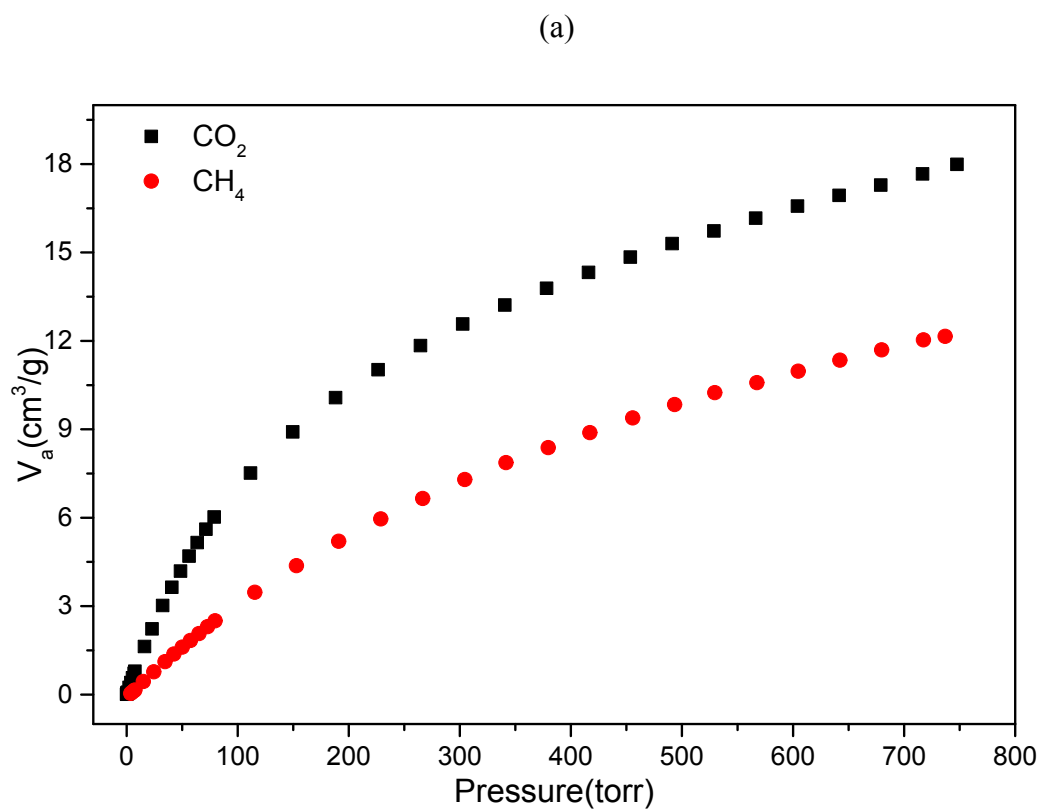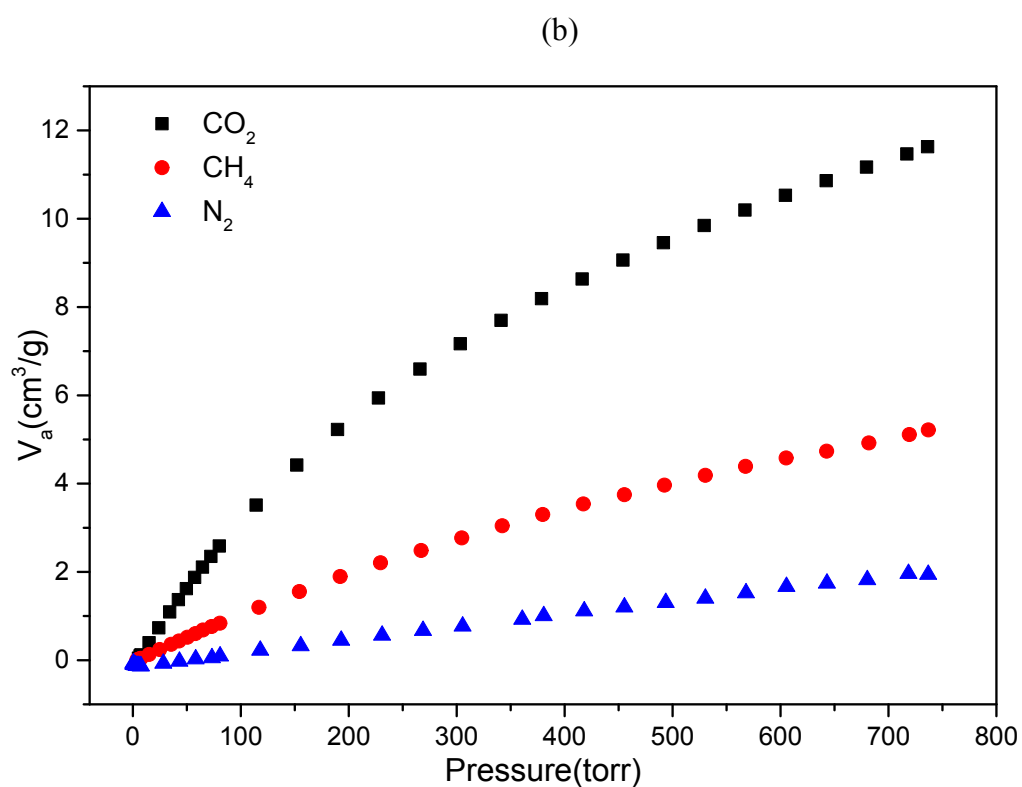

**Figure S6.** (a) The CO<sub>2</sub> and CH<sub>4</sub> gas adsorption isotherms of **1** recorded at 273 K. (b) The CO<sub>2</sub>, CH<sub>4</sub> and N<sub>2</sub> gas adsorption isotherms of **1** recorded at 298 K.

(a)

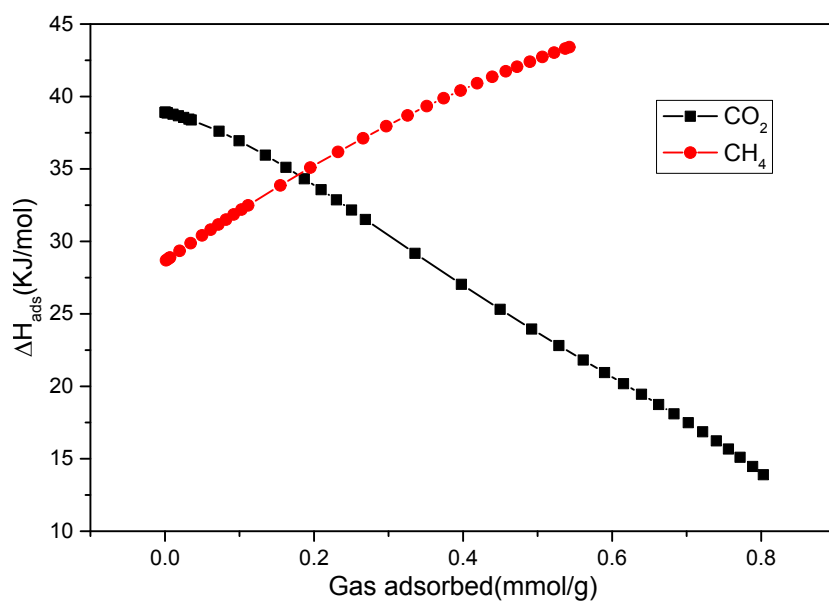

(b)

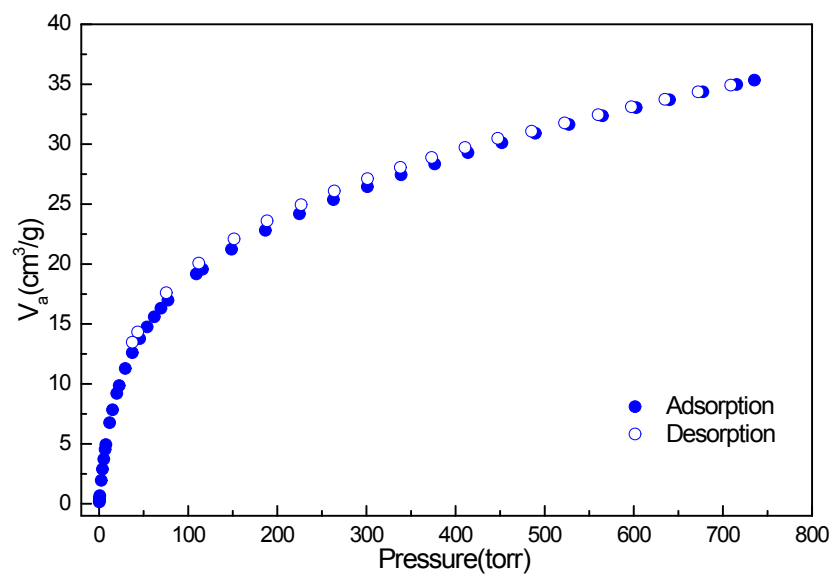

**Figure S7.** (a) The  $Q_{\text{st}}$  of compound **1** for  $\text{CO}_2$  and  $\text{CH}_4$ . (b)  $\text{H}_2$  adsorption-desorption isotherms of compound **1** at 77 K.

(a)

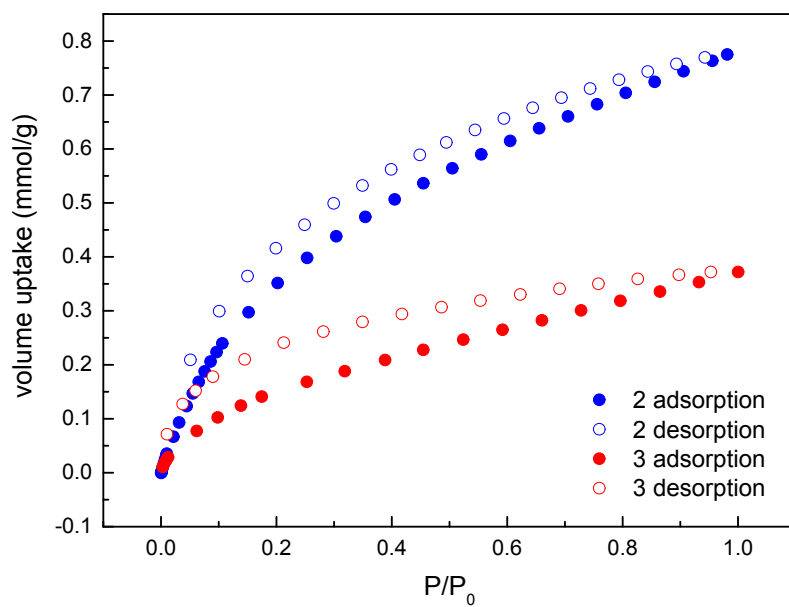

(b)

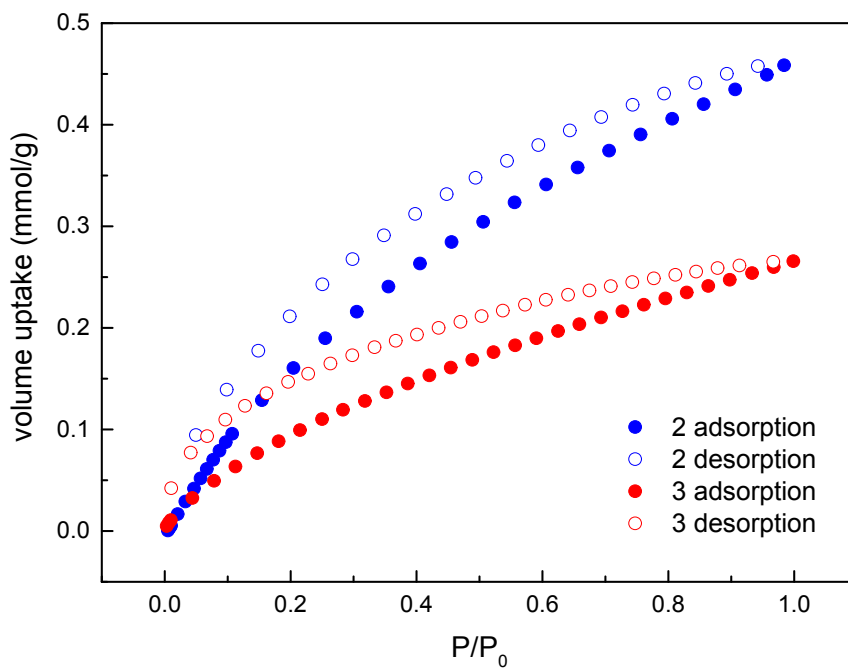

**Figure S8.** The CO<sub>2</sub> isotherm at **2** and **3** at (a) 273 K (b) 298 K.

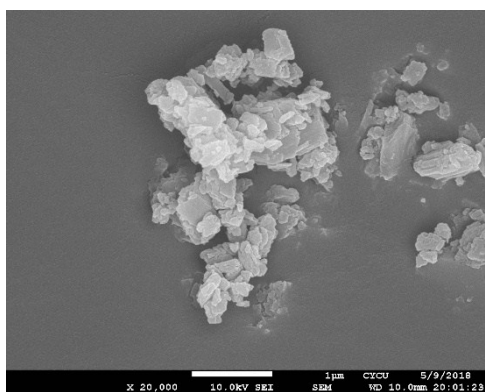

(a)

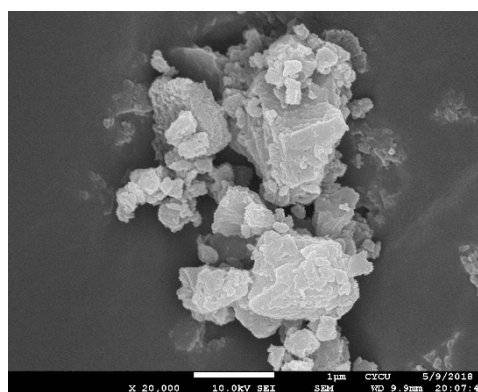

(b)

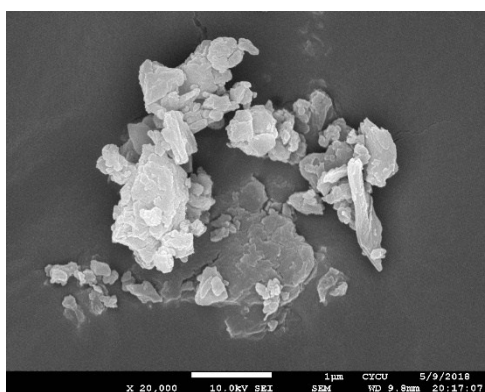

(b)

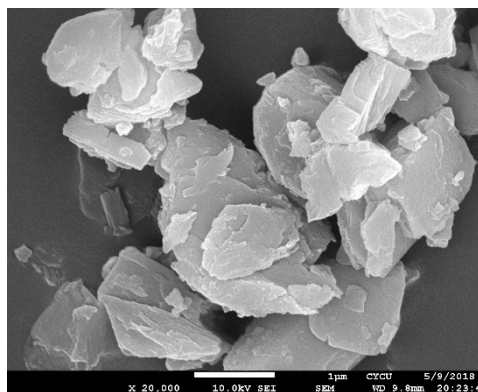

(d)

**Figure S9.** The SEM images for compound (a) **1**, (b) **2**, (c) **3**, and (d) **4**.

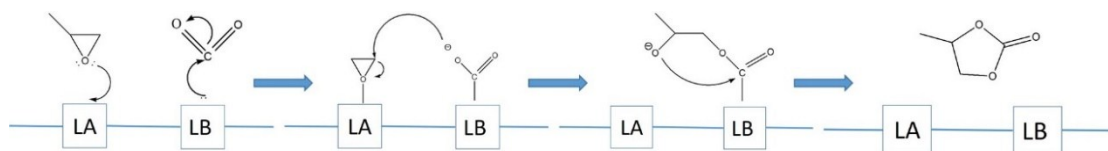

**Figure S10.** The proposed reaction mechanism for compound **3**.

**Table S3.** Coupling of propylene oxide (PO) and CO<sub>2</sub> to propylene carbonate (PC) catalyzed by various MOF/n-Bu<sub>4</sub>NBr catalytic systems.

| Catalyst         | Catalyst(g) | Co-catalyst (mol%) | Temperature(°C) | Pressure(MPa) | Reaction Times <i>T</i> (h) | Conversion (%) | ref. |
|------------------|-------------|--------------------|-----------------|---------------|-----------------------------|----------------|------|
| MOF-5            | 2.5         | 2.5                | 60              | 6             | 4                           | 98             | 37   |
| In+Dpa+1,10 phen | 0.35        | 0.35               | 60              | 1.2           | 6                           | 92             | 38   |
| In+Dpa+1,10 phen | 0.35        | 0.35               | 50              | 1.2           | 6                           | 66             | 38   |
| HKUST-1          | 0.2         | 10                 | 25              | 0.1           | 48                          | 49             | 39   |
| MOF1             | 0.2         | 10                 | 25              | 0.1           | 48                          | 96             | 39   |
| Cr-MIL-101       | 1.2         | 0.62               | 25              | 0.8           | 34                          | 82             | 40   |
| CHB              | 1.6         | 1.6                | 120             | 1.2           | 6                           | 62             | 41   |
| PCN-224          | -           | -                  | 100             | 2             | 4                           | 42             | 42   |
| Hf-Nu-1000       | 4           | 1/10               | 25              | 0.1           | 56                          | 100            | 43   |
| MMCF-2           | 0.13        | 7.2                | 25              | 0.1           | 48                          | 95.4           | 44   |
| MMPF-9           | 0.13        | 7.2                | 25              | 0.1           | 48                          | 87.4           | 45   |
| Zn-Glu           | 0.47        | 0.94               | 80              | 1.2           | 6                           | 99             | 46   |
| Ni-saldpen-MOF   | 0.7         | 2                  | 80              | 2             | 4                           | 86             | 47   |
| MIL-47           | 0.1         | 2.5                | 50              | 2             | 24                          | 95             | 48   |
| MOF-205          | 0.6         | 0.6                | 25              | 1.2           | 24                          | 89             | 49   |
| <b>1</b>         | 0.1         | 1                  | 80              | 2             | 24                          | 85             | +    |
| <b>2</b>         | 0.1         | 1                  | 80              | 2             | 24                          | 89             | +    |
| <b>3</b>         | 0.1         | 1                  | 80              | 2             | 24                          | 92             | +    |
| <b>4</b>         | 0.1         | 1                  | 80              | 2             | 24                          | 98             | +    |

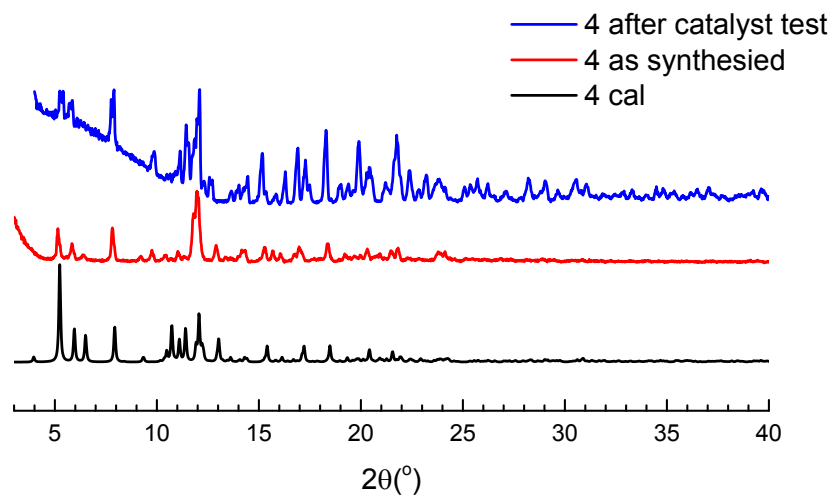

**Figure S11.** The PXRD after CO<sub>2</sub> cycloaddition of compound 4.

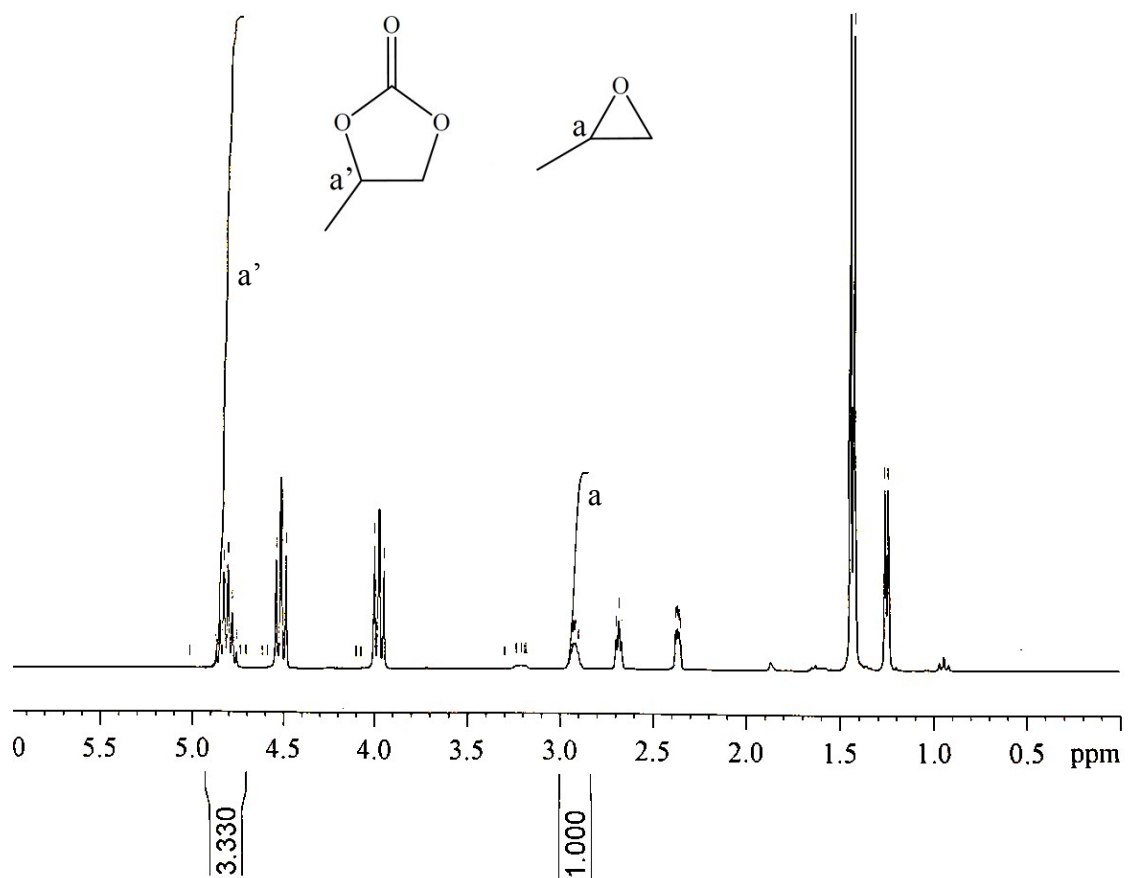

**Figure S12.** The <sup>1</sup>H NMR spectrum for PO to PC.



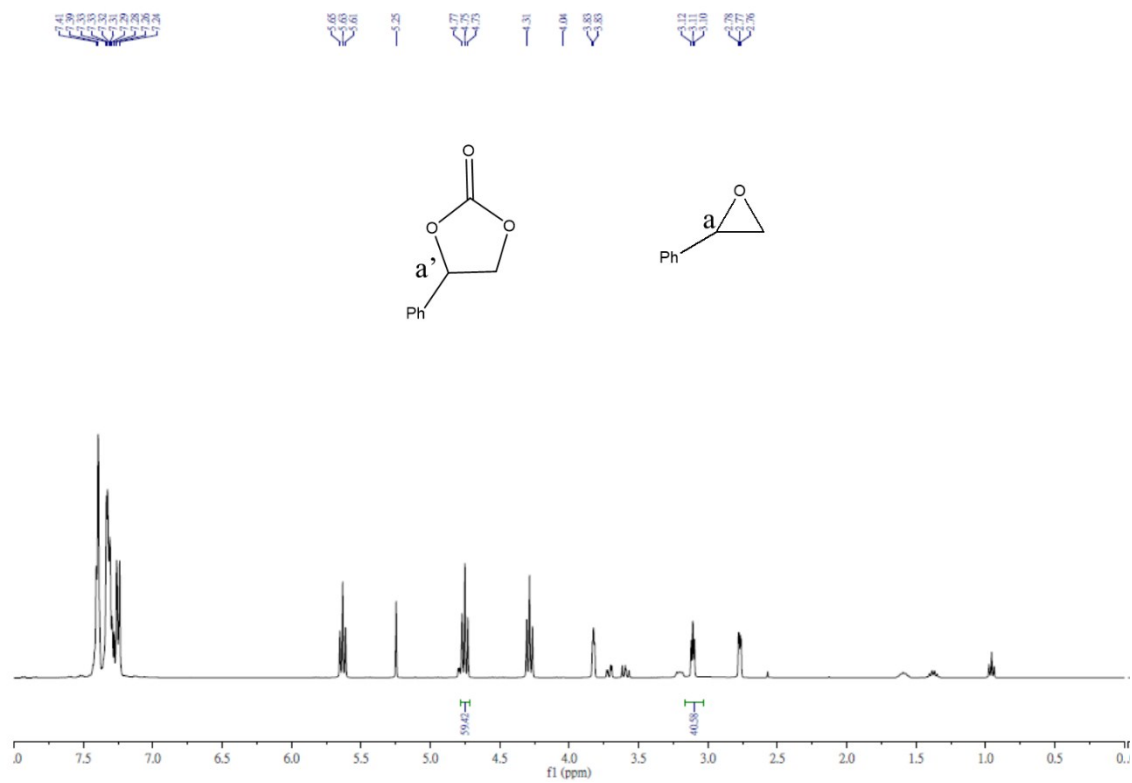

**Figure S13.** The  $^1\text{H}$  NMR spectrum for entry 1.

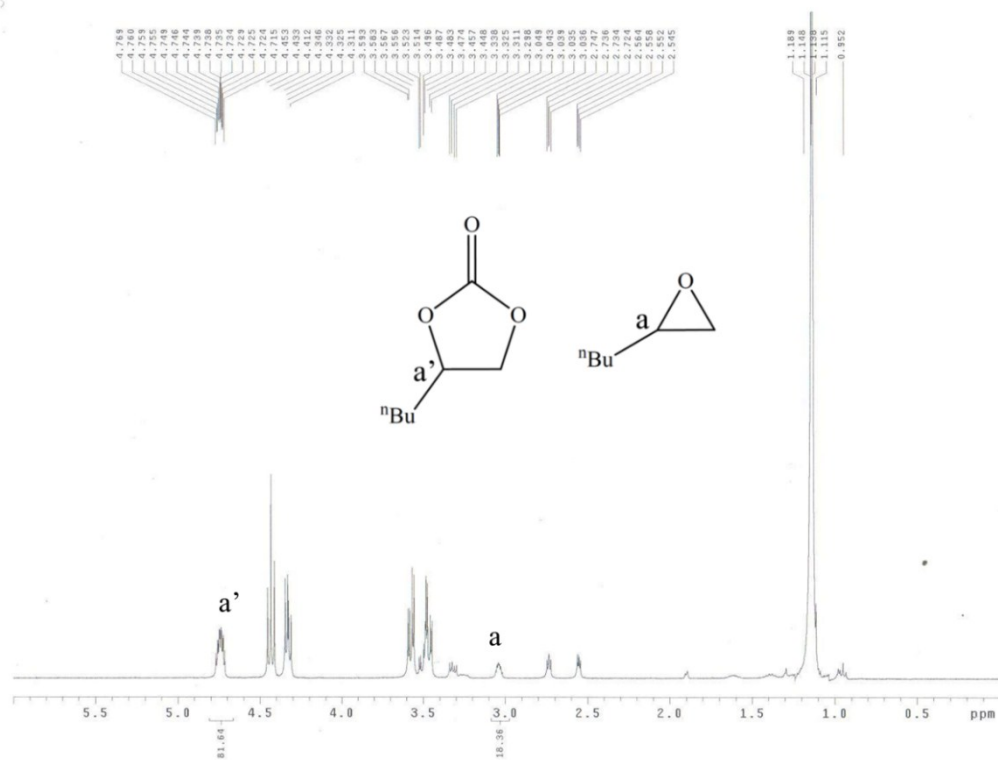

**Figure S14.** The  $^1\text{H}$  NMR spectrum for entry 2.

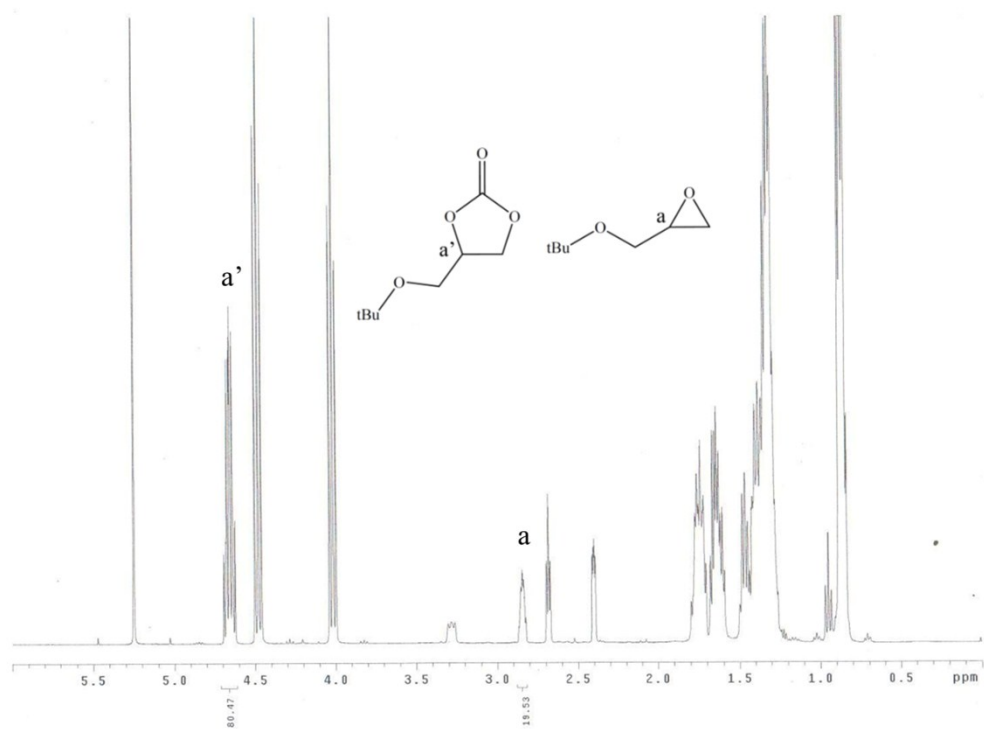

**Figure S15.** The  $^1\text{H}$  NMR spectrum for entry 3.

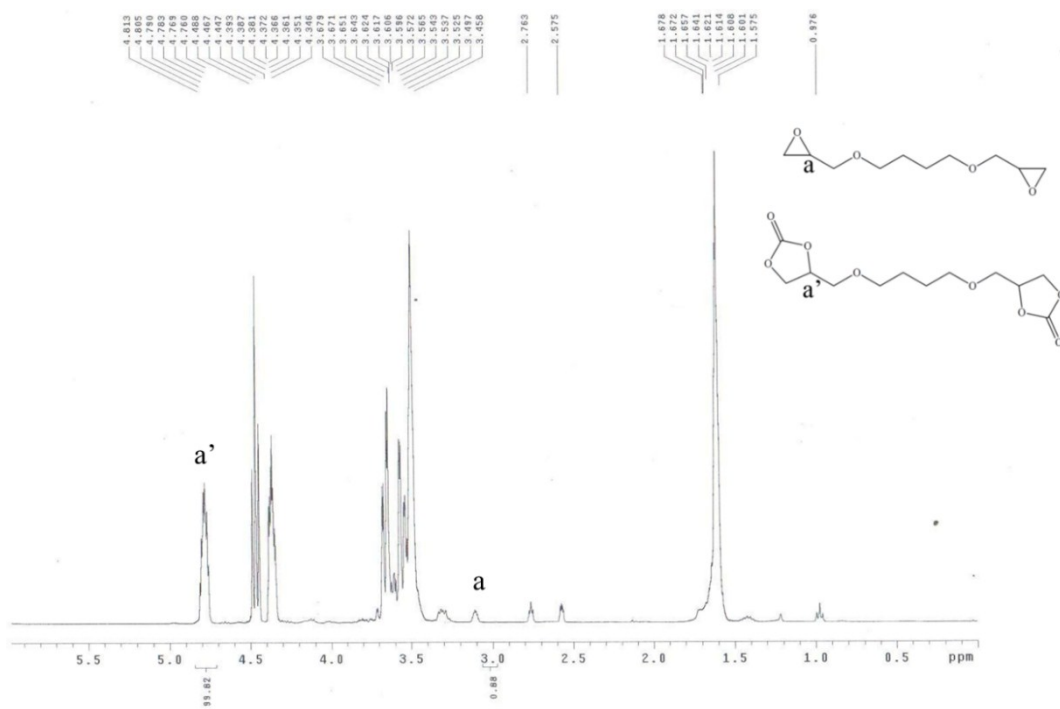

**Figure S16.** The <sup>1</sup>H NMR spectrum for entry 4.
